# Supplementary material
Source: PubMed Central journal article supplement (PMC6060362)
Supplement: JB.00137-18_zjb999094828s1.pdf [file JB.00137-18_zjb999094828s1.pdf]

## Supplementary Information

Title: **Identification of the thioredoxin partner of VKOR in mycobacterial disulfide bond formation**

Authors: Na Ke<sup>1,2</sup>, Cristina Landeta<sup>1</sup>, Xiaoyun Wang<sup>1,3</sup>, Dana Boyd<sup>1</sup>, Markus Eser<sup>1</sup>, and Jon Beckwith<sup>1\*</sup>

<sup>1</sup> Department of Microbiology and Immunobiology, Harvard Medical School, Boston MA United States 02115.

<sup>2</sup> New England Biolabs, Ipswich MA United States (current address).

<sup>3</sup> College of Life Science, State Key Laboratory of Crop Biology, Shandong Agricultural University, Tai'an, P.R. China (current address).

\* Correspondence should be addressed to: [jon\\_beckwith@hms.harvard.edu](mailto:jon_beckwith@hms.harvard.edu)

**Supplementary Table 1. DsbA homologs from *M. tuberculosis* H37Rv**

| <b>Gene in<br/><i>M. tuberculosis</i></b> | <b>Annotation<sup>#</sup></b>                                                        | <b>Essential<sup>*</sup></b> | <b>TM<sup>°</sup></b> | <b>SP<sup>°</sup></b> | <b>Length<br/>(amino acids)</b> | <b>Homolog in <i>M.<br/>smegmatis</i></b> |
|-------------------------------------------|--------------------------------------------------------------------------------------|------------------------------|-----------------------|-----------------------|---------------------------------|-------------------------------------------|
| <i>Rv0526</i>                             | Possible Thioredoxin Protein<br>(Thiol-Disulfide Interchange<br>Protein) Lipoprotein | Y                            | 0                     | Y                     | 216                             | MSMEG_0971                                |
| <i>Rv0816c (ThiX)</i>                     | Probable Thioredoxin                                                                 | N                            | 0                     | Y                     | 140                             | MSMEG_5786                                |
| <i>Rv1677 (DsbF)</i>                      | Probable Conserved<br>Lipoprotein                                                    | N                            | 0                     | Y                     | 182                             | MSMEG_3543                                |
| <i>Rv2878c (DsbE)</i>                     | Soluble Secreted Antigen<br>Mpt53 Precursor                                          | N                            | 0                     | Y                     | 173                             | MSMEG_3543                                |
| <i>Rv2969c (DsbA)</i>                     | Conserved Membrane Protein                                                           | Y                            | Y                     | 0                     | 255                             | MSMEG_2410                                |

<sup>#</sup> Gene annotation was obtained from TubercuList (1).

<sup>\*</sup> Essentiality was determined by a Himar1-base transposon mutagenesis study (2).

<sup>°</sup> The transmembrane sequences and signal peptides were predicted by Phobius (3).

N: No; Y: Yes; and 0: no transmembrane segment.

**Supplementary Figure 1.** *In vivo* redox states of four mycobacterial thioredoxin candidates.

**A.**

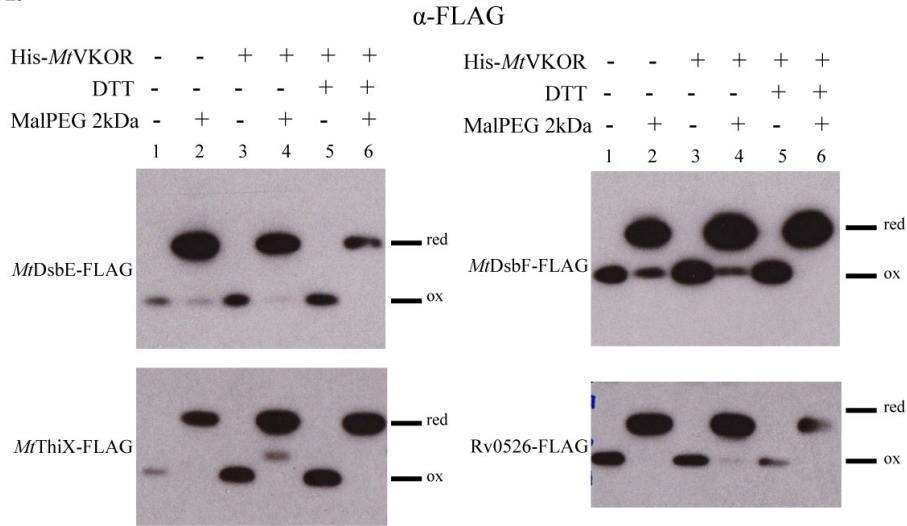

**B.**

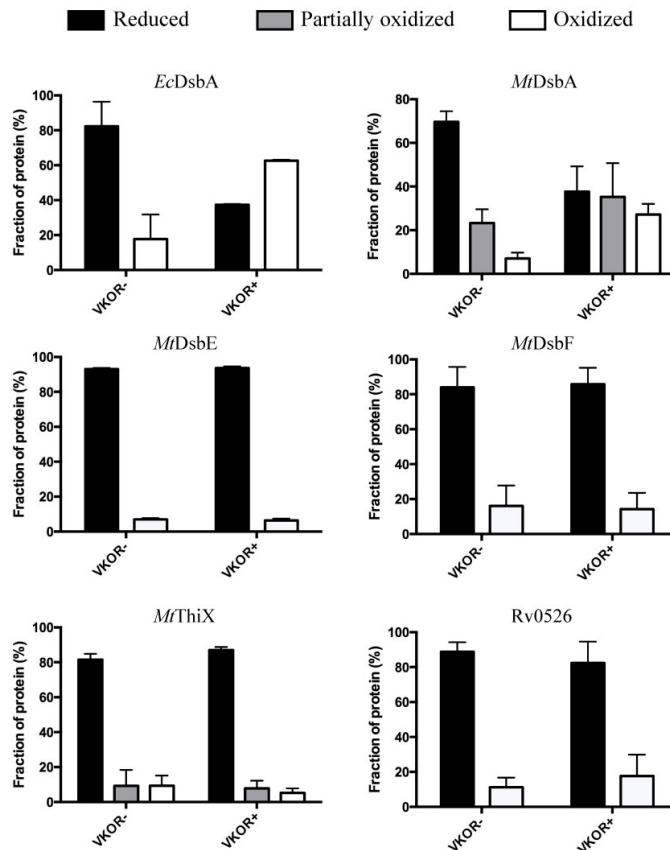

A) *In vivo* oxidation states of four thioredoxin proteins from *M. tuberculosis* with or without *Mt*VKOR in *E. coli*. The four *M. tuberculosis* thioredoxins were cloned into pBAD33 vector and expressed in truncated form (deletion of its original signal peptide or trans-membrane sequence) using an *E. coli* TorT signal sequence in  $\Delta dsbA dsbB$  strain. His-*Mt*VKOR was expressed from pTrc99a plasmid. Cells were grown in M63 media

with antibiotics and 0.2% arabinose to induce the expression of the FLAG-tagged thioredoxin candidates. 1 mM IPTG was used to induce the expression of His-*MtVVKOR*. Proteins were TCA precipitated and then alkylated with Mal-PEG2k. Thioredoxins were detected with anti-FLAG antibody. The sample without Mal-PEG2k treatment shows the position of the oxidized protein, which is the same as that of the reduced protein with no alkylating agent present. The sample with Mal-PEG2k refers to the position of the protein with reduced cysteines that are alkylated with Mal-PEG2k, which adds to the molecular weight of the protein. Red, reduced; ox, oxidized. Blots show representative results of two independent experiments. B) Quantification of reduced, oxidized and partially oxidized forms of the five mycobacterial thioredoxin candidates and *EcDsbA* in the presence or absence of *MtVVKOR* when expressed in *E. coli*. The fraction of reduced vs oxidized states of each protein were calculated from blots of at least two independent experiments using Image J. Data represent average  $\pm$  SEM.

**Supplementary Figure 2.** Comparison of *M. tuberculosis* and *M. smegmatis* DsbA proteins.

CLUSTAL 2.1 multiple sequence alignment

```

Rv2969c      VADKSKRPPRFDLKSADGSFGRLVQIGGTTIVVVFAVVLVFIYIVTSRDDKKGDVAGPGDA 60
MSMEG_2410   -MAKPKKTAKYDLKAADRKRNLVQIGLTAVVVLFVAVALVLYIVMNGEKNPD--AGAGKA 57
              *.:...:***:* . . ***** *::**:*:*:*:* . :.: * **.*.*

Rv2969c      VRVTSSKLVTPGTSNPKAVVSFYEDFLCPACGIFERFGPTVSKLVDIGAVAADYTMVA 120
MSMEG_2410   IRVASSDVVTDEGSSDPKVVGLGYEDFLCPACGNFERSFGPTISKLIDSGAIAADYVMVG 117
              :**:*:*:*:*:* *:*:*:*:*:*:*:*:*:*:*:*:*:*:*:*:*:*:*:*:*:*:*:*
              *:*:*:*:*:*:*:*:*:*:*:*:*:*:*:*:*:*:*:*:*:*:*:*

Rv2969c      ILDSASNQHYSRRAAAAAYCVADESIEAFRRFHAALFSKDIQPAELGKDFPDNARLIELA 180
MSMEG_2410   ILDRAGNG-YSSRAGGAGYCVADESTDAFRRFHTALYTPELQPQENSGIYPDNARLIELA 176
              *** *.* *****.*.****** :*****:*:*:*:* ::* * . :*****

Rv2969c      REAGVVGKVPICINSGKYIEKVDGLAAAVNVHATPTVRVNGTEYEWSTPAALVAKIKEIV 240
MSMEG_2410   RQAGAAGKVALCINNGRYVEMVKGMAAATGINATPTIRINGEDYSPPTPDALVAKVKEIV 236
              *:*:*.*.*.*.*.*.*:*:* *.*:*:*:*:*:*:*:*:*:*:*:*:*:*:*:*:*

Rv2969c      GDVPGIDSAAATATS 255
MSMEG_2410   GEVPGL----- 242
              *:*:*:*
    
```

ClustalW2 protein sequence alignment of *M. tuberculosis* DsbA (top) and *M. smegmatis* DsbA (bottom). Catalytic or structural cysteines are highlighted in red.

**Protein Sequences of the five thioredoxin candidates.**

Cysteines are highlighted in yellow. Underlined amino acids indicate the portion of the protein that was removed to fuse to *Ec*TorT signal sequence.

0526 >gi|2113988|emb|CAB08993.1| POSSIBLE THIOREDOXIN PROTEIN (THIOL-DISULFIDE INTERCHANGE PROTEIN) [Mycobacterium tuberculosis H37Rv]  
MQSRATRRSGALTMRRLVIAAAVSALLLTGCSGRDAVAQGGTFEFVSPGGKTDI  
FYDPPASRGRPGPLSGPELADPARSVSLDDFPQQVVVVNVWGQWCGPCRAEVS  
QLQRVYDATRGAGVSFLGIDVRDNNRQAPQDFINDRHVTYPSIYDPAMRTLIAF  
GGKYPTSVIPSTLVLDLRQHRVAAVFLRELLAADLQPVVVERVAEEEPSGRAPVGA  
Q

0816 >gi|2916874|emb|CAA17622.1| PROBABLE THIOREDOXIN THIX  
[Mycobacterium tuberculosis H37Rv]  
MTTMIVASVATGALATIARWLLTRRSVILREVGPETPAAPARTAELGLSGAGPT  
VVHFRAPGCAPCDRVRRGVGDVCADLGDVAHIEVDLDSNPQAARRFSVLSLPTT  
LIFVDVGRQRYRTSGVPKAAADLRSALKPLLA

1677 >gi|2916975|emb|CAA17607.1| PROBABLE CONSERVED LIPOPROTEIN  
DSBF [Mycobacterium tuberculosis H37Rv]  
MTHSRLIGALTVVAIIVTACGSQPKSQPAVAPTGDAAAATQVPAGQTVPAQLQFS  
AKTLDGHDFHGESLLGKPAVLWFWAPWCPTCQGEAPVVGQVAASHPEVTFVG  
VAGLDQVPAMQEFVNKYVPKTFQTQLADTDGSVW

2878 >gi|1403398|emb|CAA98354.1| SOLUBLE SECRETED ANTIGEN MPT53  
PRECURSOR [Mycobacterium tuberculosis H37Rv]  
MSLRLVSPIKAFADGIVAVAIAVVLMFGLANTPRAVAADERLQFTATTLSGAPFD  
GASLQGKPAVLWFWTPWCPFCNAEAPSLSQVAAANPAVTFVGIATRADVGMQ  
SFVSKYNLNFTNLNDADGVIWARYNVPWQPAFVFYRADGTSTFVNNPTAAMSQ  
DELSGRVAALTS

2969 >M. tuberculosis H37Rv|Rv2969c|Rv2969c  
VADKSKRPPREFDLKSADGSFGRLVQIGGTTIVVVFAVVLVFYIVTSRDDKKGDV  
AGPGDAVRVTSSKLVTQPGTSNPKAVVSFYEDFLCPACGIFERGFQPTVSKLVDI  
GAVAADYTMVAILDSASNQHYSSRAAAAAAYCVADESIEAFRRFHAALFSKDIQP  
AELGKDFPDNARLIELAREAGVVGKVPDCINSGKYIEKVDGLAAAVNVHATPTV  
RVNGTEYEWSTPAALVAKIKEIVGDVPGIDSAAATATS

**References**

1. Lew JM, Kapopoulou A, Jones LM, Cole ST. 2011. TubercuList- 10 years after. *Tuberculosis* 91:1–7.
2. Sasseti CM, Rubin EJ. 2003. Genetic requirements for mycobacterial survival during infection. *Proc Natl Acad Sci U S A* 100:12989–12994.
3. Käll L, Krogh A, Sonnhammer ELL. 2004. A combined transmembrane topology and signal peptide prediction method. *J Mol Biol* 338:1027–1036.
